# Supplementary material for: Lighting in the Home and Health: A Systematic Review
Source: PubMed Central journal article supplement (PMC7828303; doi:10.3390/ijerph18020609), 2021-01-12
Supplement: ijerph-18-00609-s001.pdf [file ijerph-18-00609-s001.pdf]

# Lighting in the home and health: a systematic review

Oluwapelumi Osibona, Bethlehem D Solomon and Daniela Fecht

## Content

**Table S1.** Search strategy for lighting in the home and health **Page 1**

**Table S2.** Quality assessment score using the Newcastle-Ottawa Scale **Page 4**

**Table S1.** Search strategy for lighting in the home and health

### 1.1 MEDLINE Search strategy

|    | Search Term                                                                                                  |
|----|--------------------------------------------------------------------------------------------------------------|
| 1  | Lighting/                                                                                                    |
| 2  | sunlight.mp. or Sunlight/                                                                                    |
| 3  | nightlight*.mp.                                                                                              |
| 4  | daylight*.mp.                                                                                                |
| 5  | bulb*.mp.                                                                                                    |
| 6  | lighting.mp.                                                                                                 |
| 7  | natural light*.mp.                                                                                           |
| 8  | artificial light*.mp.                                                                                        |
| 9  | lighting*1.mp.                                                                                               |
| 10 | illumination.mp.                                                                                             |
| 11 | Light/                                                                                                       |
| 12 | residential light*.mp.                                                                                       |
| 13 | domestic light*.mp.                                                                                          |
| 14 | artificial light/ or environmental control/ or illumination/ or lamps/ or light transmission/ or visibility/ |
| 15 | lamp*1.mp.                                                                                                   |
| 16 | 1 or 2 or 3 or 4 or 5 or 6 or 7 or 8 or 9 or 10 or 11 or 12 or 13 or 14 or 15                                |
| 17 | housing.mp. or Housing/ or Public Housing/ or Housing for the Elderly/                                       |
| 18 | (hous* or home*1 or resident* or apartment*).mp.                                                             |
| 19 | 17 or 18                                                                                                     |
| 20 | 16 and 19                                                                                                    |
| 21 | exp animals/ not humans.sh.                                                                                  |
| 22 | 20 not 21                                                                                                    |
| 23 | health.mp. or exp Health/ or exp Adolescent Health/                                                          |
| 24 | 22 and 23                                                                                                    |
| 25 | Mental Health/ or mental health.mp.                                                                          |
| 26 | injur*.mp.                                                                                                   |
| 27 | accidental falls/ or exp accidents, home/                                                                    |
| 28 | fall*.mp.                                                                                                    |
| 29 | 23 or 25 or 26 or 27 or 28                                                                                   |
| 30 | 22 and 29                                                                                                    |
| 31 | streetlight*.mp.                                                                                             |
| 32 | 16 or 31                                                                                                     |
| 33 | 19 and 32                                                                                                    |
| 34 | 33 not 21                                                                                                    |

|    |                                                                 |
|----|-----------------------------------------------------------------|
| 35 | 23 and 34                                                       |
| 36 | 29 and 34                                                       |
| 37 | Public Health/                                                  |
| 38 | 29 or 37                                                        |
| 39 | 34 and 38                                                       |
| 40 | public health/ or exp epidemiology/ or exp preventive medicine/ |
| 41 | 38 or 40                                                        |
| 42 | 34 and 41                                                       |
| 43 | exp Public Health/                                              |
| 44 | 38 or 43                                                        |
| 45 | 34 and 44                                                       |

### 1.2 Embase Search Strategy:

| Search Term |                                                                                                                 |
|-------------|-----------------------------------------------------------------------------------------------------------------|
| 1           | lighting.mp. or illumination/                                                                                   |
| 2           | sunlight/ or sunlight.mp.                                                                                       |
| 3           | nightlight*.mp.                                                                                                 |
| 4           | daylight*.mp.                                                                                                   |
| 5           | bulb*.mp.                                                                                                       |
| 6           | natural light*.mp.                                                                                              |
| 7           | artificial light*.mp.                                                                                           |
| 8           | lighting*1.mp.                                                                                                  |
| 9           | illumination.mp.                                                                                                |
| 10          | light/                                                                                                          |
| 11          | residential light*.mp.                                                                                          |
| 12          | domestic light*.mp.                                                                                             |
| 13          | artificial light/ or environmental control/ or illumination/ or lamps/ or light transmission/ or visibility.mp. |
| 14          | lamp*1.mp.                                                                                                      |
| 15          | streetlight*.mp.                                                                                                |
| 16          | 1 or 2 or 3 or 4 or 5 or 6 or 7 or 8 or 9 or 10 or 11 or 12 or 13 or 14 or 15                                   |
| 17          | housing.mp. or Housing/ or Public Housing/ or Housing for the Elderly/                                          |
| 18          | (hous* or home*1 or resident* or apartment*).mp.                                                                |
| 19          | 17 or 18                                                                                                        |
| 20          | 16 and 19                                                                                                       |
| 21          | (exp animals/ or nonhumans/) not exp human/                                                                     |
| 22          | 20 not 21                                                                                                       |
| 23          | exp child health/ or exp health/ or health.mp. or exp adolescent health/                                        |
| 24          | 22 and 23                                                                                                       |
| 25          | mental health.mp. or mental health/                                                                             |
| 26          | injury/ or injur*.mp.                                                                                           |
| 27          | exp falling/                                                                                                    |
| 28          | fall*.mp.                                                                                                       |
| 29          | 23 or 25 or 26 or 27 or 28                                                                                      |
| 30          | 22 and 29                                                                                                       |
| 31          | exp public health/                                                                                              |

|    |           |
|----|-----------|
| 32 | 29 or 31  |
| 33 | 22 and 32 |

### 1.3 SCOPUS search strategy

| Search Term                                                  |
|--------------------------------------------------------------|
| lighting AND (home OR housing) AND (health OR public health) |

**Table S2.** Quality assessment score using the Newcastle-Ottawa Scale

| Author, Year                     | Selection | Comparability | Outcomes | Total score |
|----------------------------------|-----------|---------------|----------|-------------|
| Case-control studies             |           |               |          |             |
| Rahayu, 2015 <sup>28</sup>       | ★★        | ★             | ★★       | 5           |
| Chen, 2017 <sup>33</sup>         | ★★        | ★             | ★★       | 5           |
| Woldesemayat, 2014 <sup>36</sup> | ★★        | NA            | ★★       | 4           |
| Savitha, 2007 <sup>37</sup>      | ★★★       | NA            | ★★       | 5           |
| Mashreky, 2010 <sup>38</sup>     | ★★★       | NA            | ★★       | 5           |
| Camilloni, 2011 <sup>39</sup>    | ★★        | ★★            | ★        | 5           |
| Isberner, 1998 <sup>41</sup>     | ★★        | NA            | ★★       | 4           |
| O'Leary, 2006 <sup>45</sup>      | ★★        | ★★            | ★        | 5           |
| Cohort studies                   |           |               |          |             |
| Obayashi, 2018 <sup>52</sup>     | ★★★       | ★★            | ★★       | 7           |
| Obayashi, 2014 <sup>54</sup>     | ★★        | ★★            | ★★★      | 7           |
| Cross-sectional studies          |           |               |          |             |
| Ichimori, 2013 <sup>31</sup>     | ★★★       | NA            | ★★       | 5           |
| Kumar, 2001 <sup>29</sup>        | ★★        | NA            | ★★       | 4           |
| Brown, 2011 <sup>30</sup>        | ★★        | ★★            | ★★       | 6           |
| Youngstedt, 2004 <sup>32</sup>   | ★★★       | NA            | ★★       | 5           |
| Patel, 2019 <sup>27</sup>        | ★★        | ★★            | ★★       | 6           |
| Shi, 2014 <sup>40</sup>          | ★★★       | ★★            | ★★       | 7           |
| Czepita, 2004 <sup>42</sup>      | ★★        | NA            | ★★★      | 5           |
| Kayaba, 2014 <sup>44</sup>       | ★★        | ★★            | ★★       | 6           |
| Obayashi, 2015 <sup>46</sup>     | ★★★★      | ★★            | ★★★      | 9           |
| Obayashi, 2013 <sup>47</sup>     | ★★★       | ★★            | ★★★      | 8           |
| Obayashi, 2014 <sup>48</sup>     | ★★★       | ★★            | ★★★      | 8           |
| Obayashi, 2014 <sup>49</sup>     | ★★★★      | ★★            | ★★★      | 9           |
| Obayashi, 2013 <sup>51</sup>     | ★★★★      | ★★            | ★★       | 8           |
| Obayashi, 2014 <sup>53</sup>     | ★★★★      | ★★            | ★★★      | 9           |
| Intervention studies             |           |               |          |             |
| Brunnstrom, 2004 <sup>34</sup>   | ★★        | ★             | ★★       | 5           |
| Falkenberg, 2019 <sup>35</sup>   | ★★★       | ★★            | ★★       | 7           |
| Hopkins, 2017 <sup>43</sup>      | ★★        | ★★            | ★★       | 6           |
| Yamauchi, 2014 <sup>50</sup>     | ★★★       | NA            | ★★★      | 6           |

Abbreviations: NA – not applicable
